# Supplementary material for: Association Between Artificial Intelligence-Derived Tumor Volume and Oncologic Outcomes for Localized Prostate Cancer Treated with Radiation Therapy
Source: bioRxiv or medRxiv preprint supplement (doi:10.1101/2023.04.16.23288642), 2023-04-24
Supplement: Supplementary file [file media-1.pdf]

Table S1: Formation of the patient cohort.

|      |                                                                                       |
|------|---------------------------------------------------------------------------------------|
| 3161 | patients who underwent prostate RT at BWH between 1/09-1/18                           |
|      | Pre-RT                                                                                |
| 867  | mpMRI                                                                                 |
| 764  | Pre-RT mpMRI at BWH                                                                   |
| 704  | Pre-RT mpMRI at BWH with GE scanner (high-resolution diffusion weighted images (DWI)) |
| 497  | Pre-RT high B-value ( $\geq 1400$ ) DWI mpMRI with GE scanner                         |
|      | 59 Excluded for the following reasons                                                 |
|      | 1 1.5T interventional MRI                                                             |
|      | 10 Hip artifacts                                                                      |
|      | 1 Large hematoma                                                                      |
|      | 4 MRI > 1 month on ADT                                                                |
|      | 4 MRI > 1 year old                                                                    |
|      | 4 N1 disease                                                                          |
|      | 11 No endorectal coil                                                                 |
|      | 1 Partial prostatectomy                                                               |
|      | 1 Penile implant                                                                      |
|      | 11 Prior ADT                                                                          |
|      | 1 Prior microwave ablation                                                            |
|      | 1 Prior sarcoid                                                                       |
|      | 8 Severe DWI artifacts                                                                |
|      | 1 Wide FOV (pelvis)                                                                   |
| 438  | Final cohort                                                                          |

Table S2: Scanning acquisition parameters. All diffusion-weighted imaging (DWI) scans were obtained with a B-value  $\geq 1000$  s/mm<sup>2</sup> with an endorectal coil.

| Characteristic  | Signa HDxt (N = 237)          | DISCOVERY MR750w (N = 201)    |
|-----------------|-------------------------------|-------------------------------|
| Acquisition     |                               |                               |
| Echo Time       | 2,500.00 (2,500.00, 2,500.00) | 7,550.00 (7,300.00, 7,550.00) |
| Repetition Time | 81.20 (80.60, 81.40)          | 78.80 (77.90, 79.20)          |
| Field Strength  | 3.00 (3.00, 3.00)             | 3.00 (3.00, 3.00)             |
| Image           |                               |                               |
| Pixel spacing   | 0.70 (0.70, 0.70)             | 0.70 (0.70, 0.70)             |
| Slice spacing   | 3.00 (3.00, 3.00)             | 4.00 (4.00, 4.00)             |
| Recon Diameter  | 180.00 (180.00, 180.00)       | 179.99 (179.99, 179.99)       |

Table S3: Performance of AI algorithm for segmenting the TZ and PZ.

|                      | TrainPIRADS (N = 150) | TestPIRADS (N = 83) |
|----------------------|-----------------------|---------------------|
| TZ Dice Median (IQR) | 0.88 (0.83, 0.92)     | 0.89 (0.84, 0.92)   |
| PZ Dice Median (IQR) | 0.83 (0.75, 0.88)     | 0.84 (0.79, 0.87)   |

Table S4: nnUNet performance.

| Performance           | TrainPIRADS (N = 150) | TestPIRADS (N = 83) | TestNOPIRADS (N = 205) |
|-----------------------|-----------------------|---------------------|------------------------|
| Patient-level AUROC   | 0.906                 | 0.827               | 0.785                  |
| Sensitivity at 0.5 FP | 71.8%                 | 72.7%               | 65.8%                  |
| Average Precision     | 67.8%                 | 67.0%               | 56.8%                  |

Table S5: Patient-specific volume characteristics.

| Patient-level characteristics        | TrainPIRADS (N = 150) | TestPIRADS (N = 83) | TestNOPIRADS (N = 205) |
|--------------------------------------|-----------------------|---------------------|------------------------|
| <b>Classification</b>                |                       |                     |                        |
| Num TP                               | 128 (85.33%)          | 62 (74.70%)         | 117 (57.07%)           |
| Num FP                               | 5 (3.33%)             | 9 (10.84%)          | 36 (17.56%)            |
| Num FN                               | 16 (10.67%)           | 11 (13.25%)         | 32 (15.61%)            |
| Num TN                               | 1 (0.67%)             | 1 (1.20%)           | 20 (9.76%)             |
| <b>Num Ref DIL</b>                   |                       |                     |                        |
| 0                                    | 6 (4.00%)             | 10 (12.05%)         | 56 (27.32%)            |
| 1                                    | 97 (64.67%)           | 49 (59.04%)         | 118 (57.56%)           |
| 2                                    | 36 (24.00%)           | 20 (24.10%)         | 19 (9.27%)             |
| ≥3                                   | 11 (7.33%)            | 4 (4.82%)           | 12 (5.85%)             |
| <b>Num Test DIL</b>                  |                       |                     |                        |
| 0                                    | 5 (3.33%)             | 6 (7.23%)           | 36 (17.56%)            |
| 1                                    | 89 (59.33%)           | 45 (54.22%)         | 120 (58.54%)           |
| 2                                    | 44 (29.33%)           | 25 (30.12%)         | 41 (20.00%)            |
| ≥3                                   | 12 (8.00%)            | 7 (8.43%)           | 8 (3.90%)              |
| <b>Total Volume (cm<sup>3</sup>)</b> |                       |                     |                        |
| Reference                            | 1.84 (0.78, 4.81)     | 1.31 (0.37, 2.61)   | 0.28 (0.00, 0.97)      |
| Test                                 | 1.50 (0.71, 3.51)     | 1.02 (0.40, 2.34)   | 0.52 (0.10, 1.38)      |

Table S6: Lesion-specific volume characteristics.

| Lesion-level characteristics | TrainPIRADS (N = 271)  | TestPIRADS (N = 145)  | TestNOPIRADS (N = 299) |
|------------------------------|------------------------|-----------------------|------------------------|
| <b>Classification</b>        |                        |                       |                        |
| Num TP                       | 145 (53.1%)            | 73 (50.3%)            | 129 (43.1%)            |
| Num FP                       | 69 (25.5%)             | 44 (30.3%)            | 103 (34.5%)            |
| Num FN                       | 57 (21.0%)             | 28 (19.3%)            | 67 (22.4%)             |
| <b>Volume</b>                |                        |                       |                        |
| All                          | 0.59 (0.20, 1.78)      | 0.57 (0.23, 1.50)     | 0.32 (0.11, 0.82)      |
| TP (nonzero)                 | 145; 1.23 (0.58, 3.54) | 73; 1.06 (0.47, 1.85) | 129; 0.70 (0.32, 1.51) |
| FP (nonzero)                 | 69; 0.18 (0.08, 0.33)  | 44; 0.25 (0.09, 0.58) | 103; 0.22 (0.10, 0.45) |
| FN (nonzero)                 | 57; 0.31 (0.19, 0.69)  | 28; 0.37 (0.21, 0.88) | 67; 0.11 (0.07, 0.25)  |
| <b>Contrast</b>              |                        |                       |                        |
| All                          | 0.77 (0.72, 0.83)      | 0.78 (0.71, 0.84)     | 0.77 (0.71, 0.82)      |
| TP (nonzero)                 | 145; 0.73 (0.68, 0.78) | 73; 0.72 (0.68, 0.76) | 129; 0.73 (0.69, 0.78) |
| FP (nonzero)                 | 69; 0.84 (0.76, 0.88)  | 44; 0.83 (0.79, 0.86) | 103; 0.81 (0.77, 0.85) |
| FN (nonzero)                 | 57; 0.82 (0.77, 0.86)  | 28; 0.81 (0.79, 0.88) | 67; 0.78 (0.74, 0.83)  |
| <b>Metrics for TP</b>        |                        |                       |                        |
| Dice Median (IQR)            | 145; 0.77 (0.64, 0.84) | 73; 0.74 (0.58, 0.82) | 129; 0.71 (0.56, 0.79) |

Table S7: Detection of clinically significant disease by the AI versus reference contours for subset of cases 303 cases across all 3 cohorts with sextant biopsies.

| Location   | AI contour AUC    | Ref contour AUC   | p-value |
|------------|-------------------|-------------------|---------|
| Left apex  | 0.71 (0.64, 0.77) | 0.74 (0.67, 0.80) | 0.24    |
| Right apex | 0.73 (0.69, 0.80) | 0.76 (0.70, 0.83) | 0.29    |
| Left mid   | 0.70 (0.64, 0.77) | 0.70 (0.64, 0.76) | 0.81    |
| Right mid  | 0.77 (0.71, 0.83) | 0.78 (0.72, 0.84) | 0.75    |
| Left base  | 0.68 (0.62, 0.74) | 0.65 (0.59, 0.71) | 0.39    |
| Right base | 0.68 (0.62, 0.75) | 0.72 (0.65, 0.79) | 0.14    |

Table S8: Lesion-specific characteristics of AI contours for PI-RADS 3-5 lesions.

| PI-RADS lesion characteristics | 3 (N = 51)            | 4 (N = 120)           | 5 (N = 132)            |
|--------------------------------|-----------------------|-----------------------|------------------------|
| Lesion-Level Metric            |                       |                       |                        |
| Num TP                         | 21 (41.2%)            | 82 (68.3%)            | 115 (87.1%)            |
| Num FN                         | 30 (58.8%)            | 38 (31.7%)            | 17 (12.9%)             |
| Performance                    |                       |                       |                        |
| Sensitivity                    | 41.2%                 | 68.3%                 | 87.1%                  |
| Volume                         | 0.28 (0.14, 0.65)     | 0.51 (0.26, 0.81)     | 2.87 (1.20, 4.84)      |
| Contrast                       | 0.83 (0.78, 0.86)     | 0.76 (0.71, 0.81)     | 0.72 (0.67, 0.77)      |
| Metrics for TP                 |                       |                       |                        |
| Dice Median (IQR)              | 21; 0.47 (0.41, 0.74) | 82; 0.74 (0.60, 0.81) | 115; 0.78 (0.69, 0.84) |



Table S9: Cox regression for factors associated with time to metastasis for the subset of 233 patients with available PI-RADS scores.

CI: confidence interval. HR: hazard ratio. AHR: adjusted hazard ratio. SOC: standard of care treatment. Ref: reference.

| Characteristic     | HR                 | p-value | AHR                | P-value |
|--------------------|--------------------|---------|--------------------|---------|
| Clinical T-stage   |                    |         |                    |         |
| T1c-T2c (ref)      | -                  | -       |                    |         |
| T3a-T3b            | 1.99 [0.43, 9.25]  | 0.38    |                    |         |
| Radiologic T-stage |                    |         |                    |         |
| T1-T2 (ref)        | -                  | -       |                    |         |
| T3a-T3b            | 2.70 [0.79, 9.25]  | 0.11    |                    |         |
| PIRADS             |                    |         |                    |         |
| 0-4 (ref)          | -                  | -       |                    |         |
| 5                  | 4.00 [0.86, 18.53] | 0.08    |                    |         |
| Age                | 0.91 [0.84, 0.99]  | 0.04    | 0.94 [0.87, 1.03]  | 0.018   |
| SOC                | 0.66 [0.19, 2.27]  | 0.51    |                    |         |
| Year of Treatment  | 1.05 [0.80, 1.39]  | 0.72    |                    |         |
| MRI model          | 1.17 [0.26, 5.14]  | 0.83    |                    |         |
| Salvage ADT        | 9.95 [1.88, 52.65] | 0.007   | 3.85 [0.65, 22.80] | 0.14    |
| AI Volume          | 1.88 [1.17, 3.00]  | 0.009   | 1.71 [1.04, 2.80]  | 0.04    |

Table S10: Cox regression model for local recurrence.

CI: confidence interval. HR: hazard ratio. AHR: adjusted hazard ratio. SOC: standard of care treatment. Ref: reference. FIR: favorable intermediate-risk. UIR: unfavorable intermediate-risk.

| Characteristic     | HR                 | p-value | AHR               | p-value |
|--------------------|--------------------|---------|-------------------|---------|
| NCCN+              |                    |         |                   |         |
| Low/FIR (ref)      | -                  | -       |                   |         |
| UIR/High/Very high | 1.85 [0.62, 5.55]  | 0.27    |                   |         |
| Age                | 0.92 [0.85, 0.99]  | 0.02    | 0.92 [0.85, 0.99] | 0.02    |
| SOC                | 0.86 [0.24, 3.08]  | 0.82    |                   |         |
| Year of Treatment  | 1.07 [0.82, 1.39]  | 0.64    |                   |         |
| MRI model          | 1.52 [0.49, 4.70]  | 0.47    |                   |         |
| Salvage ADT        | 4.51 [1.00, 20.38] | 0.05    | 1.73 [0.31, 9.62] | 0.53    |
| AI Volume          | 1.41 [1.00, 1.98]  | 0.05    | 1.34 [0.95, 1.89] | 0.09    |

Table S11: Association of AI DIL volume ranges with baseline clinical and radiographic factors

| Characteristic       | 0-0.4 (N = 151) | 0.5-1.9 (N = 169) | 2.0- (N = 118) | p-value |
|----------------------|-----------------|-------------------|----------------|---------|
| NCCN+ category       |                 |                   |                | <0.001  |
| Low                  | 58 (38.41%)     | 45 (26.63%)       | 4 (3.39%)      |         |
| FIR                  | 48 (31.79%)     | 43 (25.44%)       | 14 (11.86%)    |         |
| UIR                  | 31 (20.53%)     | 49 (28.99%)       | 34 (28.81%)    |         |
| High                 | 14 (9.27%)      | 29 (17.16%)       | 48 (40.68%)    |         |
| Very High            | 0 (0.00%)       | 3 (1.78%)         | 18 (15.25%)    |         |
| Model                |                 |                   |                | <0.001  |
| Signa HDxt           | 114 (75.50%)    | 89 (52.66%)       | 34 (28.81%)    |         |
| DISCOVERY            |                 |                   |                |         |
| MR750w               | 37 (24.50%)     | 80 (47.34%)       | 84 (71.19%)    |         |
| PIRADS               |                 |                   |                | <0.001  |
| 0-2                  | 9 (5.96%)       | 6 (3.55%)         | 1 (0.85%)      |         |
| 3                    | 16 (10.60%)     | 6 (3.55%)         | 1 (0.85%)      |         |
| 4                    | 15 (9.93%)      | 47 (27.81%)       | 10 (8.47%)     |         |
| 5                    | 10 (6.62%)      | 35 (20.71%)       | 77 (65.25%)    |         |
| Radiographic T-stage |                 |                   |                | <0.001  |
| T1                   | 9/50 (18.00%)   | 6/94 (6.38%)      | 1/89 (1.12%)   |         |
| T2                   | 34/50 (68.00%)  | 66/94 (70.21%)    | 32/89 (35.96%) |         |
| T3a                  | 6/50 (12.00%)   | 20/94 (21.28%)    | 39/89 (43.82%) |         |
| T3b                  | 1/50 (2.00%)    | 2/94 (2.13%)      | 17/89 (19.10%) |         |

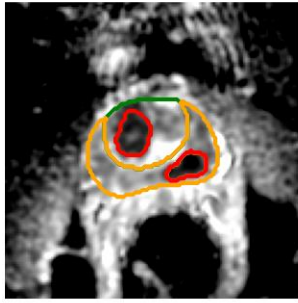

a)

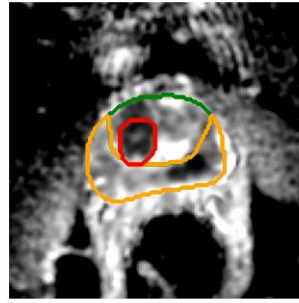

b)

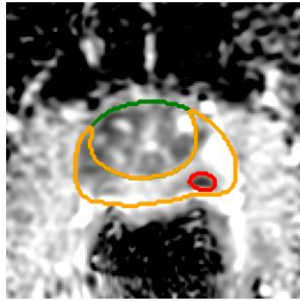

c)

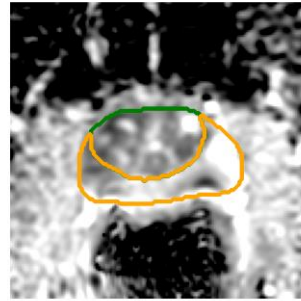

d)

Fig S1: Example of AI (a, c) and reference (b, d) DILs. The green, orange, and red contours correspond to the TZ, PZ, and DIL, respectively. In a), the AI algorithm detected a R TZ-ant PI-RADS 5 lesion, as well as a L apical lesion, which was not present in the reference image (b). However, GS 3+4 disease was present in the L apex on sextant biopsy. In c) the AI algorithm delineated a DIL in the left apex, which was not present in the reference image (d), and could be attributed to an artifact from the endorectal coil.

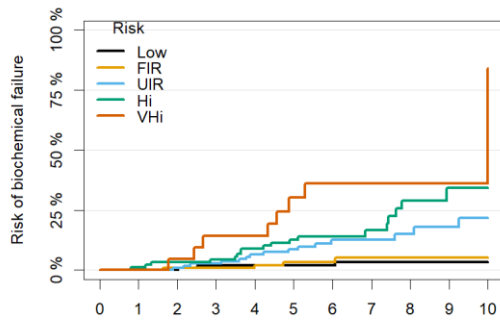

| Risk | Time (years) |     |     |     |    |    |    |    |    |    |    |
|------|--------------|-----|-----|-----|----|----|----|----|----|----|----|
| Low: | 107          | 104 | 99  | 96  | 91 | 80 | 70 | 63 | 55 | 43 | 14 |
| FIR: | 105          | 103 | 99  | 96  | 88 | 69 | 51 | 42 | 38 | 21 | 6  |
| UIR: | 114          | 114 | 109 | 103 | 94 | 71 | 52 | 41 | 28 | 23 | 7  |
| Hi:  | 91           | 88  | 85  | 82  | 77 | 61 | 40 | 29 | 18 | 11 | 5  |
| VHi: | 21           | 21  | 20  | 18  | 17 | 12 | 8  | 5  | 3  | 1  | 0  |

a)

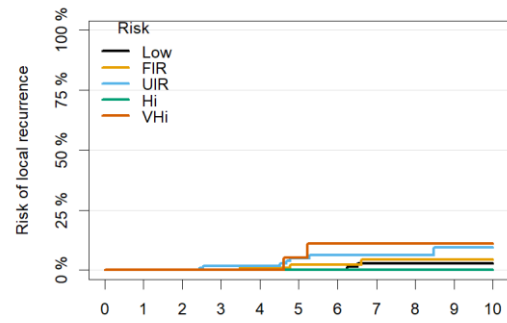

| Risk | Time (years) |     |     |     |    |    |    |    |    |    |    |
|------|--------------|-----|-----|-----|----|----|----|----|----|----|----|
| Low: | 107          | 104 | 99  | 98  | 93 | 82 | 72 | 64 | 56 | 44 | 14 |
| FIR: | 105          | 103 | 100 | 97  | 89 | 69 | 51 | 42 | 38 | 21 | 6  |
| UIR: | 114          | 114 | 110 | 104 | 99 | 74 | 54 | 41 | 28 | 23 | 9  |
| Hi:  | 91           | 89  | 88  | 85  | 84 | 69 | 48 | 36 | 25 | 15 | 7  |
| VHi: | 21           | 21  | 21  | 21  | 20 | 16 | 11 | 7  | 4  | 1  | 0  |

b)

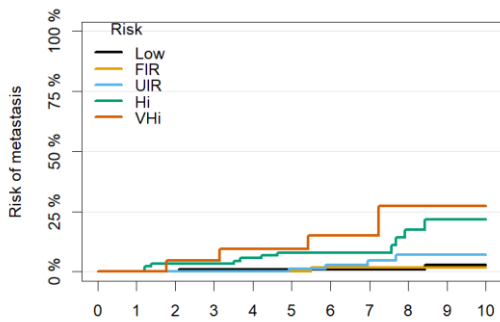

| Risk | Time (years) |     |     |     |     |    |    |    |    |    |    |
|------|--------------|-----|-----|-----|-----|----|----|----|----|----|----|
| Low: | 107          | 104 | 99  | 97  | 92  | 81 | 71 | 65 | 57 | 44 | 14 |
| FIR: | 105          | 103 | 100 | 97  | 90  | 71 | 52 | 44 | 38 | 21 | 6  |
| UIR: | 114          | 114 | 110 | 106 | 101 | 78 | 56 | 42 | 28 | 24 | 8  |
| Hi:  | 91           | 89  | 85  | 83  | 80  | 65 | 45 | 33 | 21 | 13 | 6  |
| VHi: | 21           | 21  | 20  | 20  | 18  | 16 | 10 | 7  | 4  | 2  | 1  |

c)

Fig. S2: Association of volume with expanded NCCN risk category (NCCN+) for a) biochemical failure, b) local failure, and c) metastasis.
